# Supplementary material for: X-Ray excited luminescence of organo-lanthanide complexes
Source: Royal Society of Chemistry journal article supplement (doi:10.1039/c9cp03041g), 2019-01-01
Supplement: c9cp03041g1.pdf [file c9cp03041g1.pdf]

Supplementary materials

## X-ray excited luminescence of organo-lanthanide complexes

Andrey A. Kukinov,<sup>a,b</sup> Tatyana V. Balashova,<sup>a</sup> Vasily A. Ilichev,<sup>a</sup> Alexey N. Trufanov,<sup>c</sup> Mikhail N. Ivin,<sup>c</sup> Sergey V. Obolensky,<sup>b</sup> and Mikhail N. Bochkarev<sup>a,b\*</sup>

<sup>a</sup> G. A. Razuvaev Institute of Organometallic Chemistry of Russian Academy of Sciences, Tropinina 49, 603950, Nizhny Novgorod, Russian Federation

<sup>b</sup> Nizhny Novgorod State University, Gagarina avenue 23/2, 603950, Nizhny Novgorod, Russian Federation

<sup>c</sup> Branch of RFYaTs-VNIIEF «Yu.E. Sedakov FNCP NIIS», Tropinina 47, 603950, Nizhny Novgorod, Russian Federation

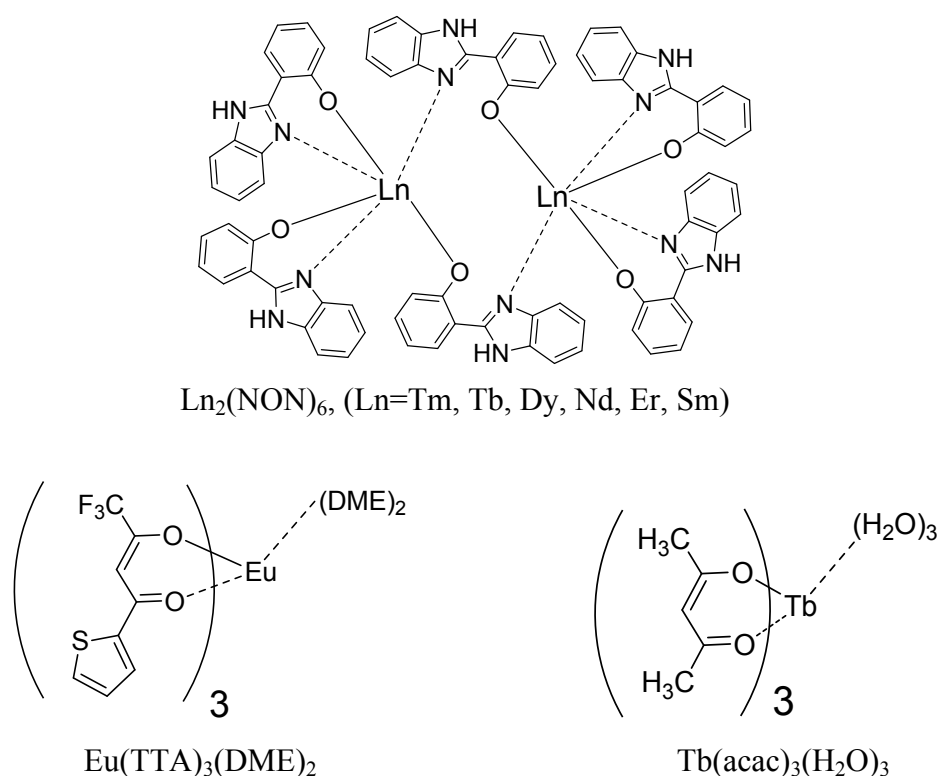

Fig. S1. Chemical structures of the organo-lanthanide complexes used in the study.

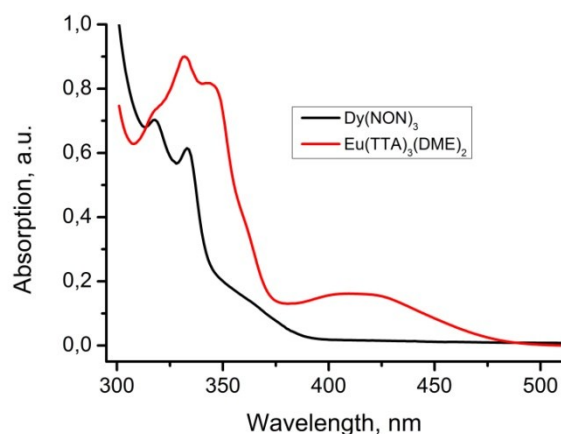

Fig. S2. Absorption spectra of Dy(NON)<sub>3</sub> and Eu(TTA)<sub>3</sub>(DME)<sub>2</sub> in THF solutions. The absorption spectra of Er(NON)<sub>3</sub>, Nd(NON)<sub>3</sub>, Tm(NON)<sub>3</sub>, Tb(NON)<sub>3</sub> and Sm(NON)<sub>3</sub> are identical to that of Dy(NON)<sub>3</sub>.

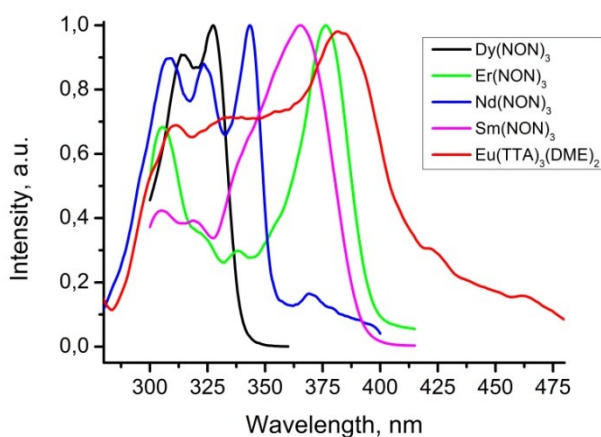

Fig. S3. PL excitation spectra of Dy(NON)<sub>3</sub> ( $\lambda_{em}$  460 nm), Er(NON)<sub>3</sub> ( $\lambda_{em}$  420 nm), Nd(NON)<sub>3</sub> ( $\lambda_{em}$  420 nm), Sm(NON)<sub>3</sub> ( $\lambda_{em}$  650 nm) and Eu(TTA)<sub>3</sub>(DME)<sub>2</sub> ( $\lambda_{em}$  615 nm) in THF solutions.

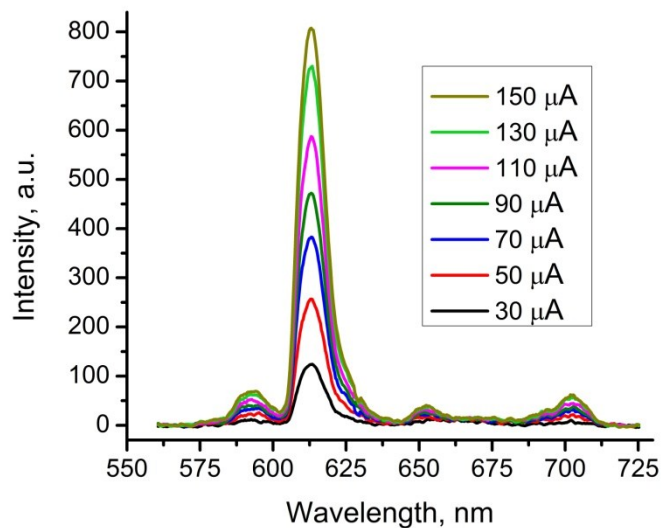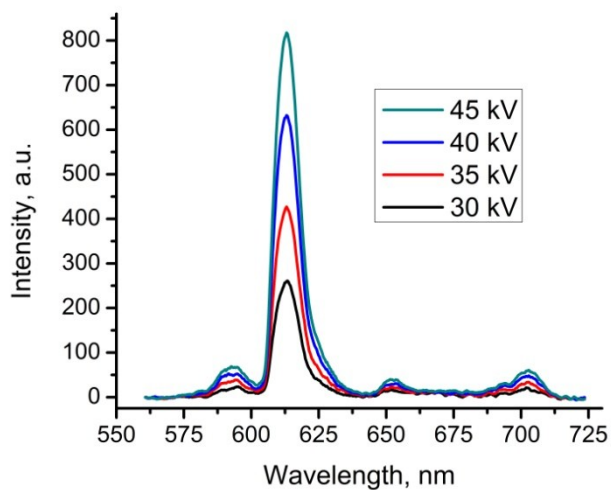

Fig. S4. Intensity of the band of  ${}^5\text{D}_0 - {}^7\text{F}_2$  transition in the RL spectrum of  $\text{Eu}(\text{TTA})_3(\text{DME})_2$  dependence on anode current and accelerating bias.
